# Supplementary material for: Berry Consumption in Relation to Allostatic Load in US Adults: The National Health and Nutrition Examination Survey, 2003–2010
Source: MDPI journal article supplement (doi:10.3390/nu16030403), 2024-01-30
Supplement: s1 [file s1]

**Table S1.** Structure of AL (domain) score.

| Score assignment for each biomarker measurement                                                          |                            |                              |                                             |                   |
|----------------------------------------------------------------------------------------------------------|----------------------------|------------------------------|---------------------------------------------|-------------------|
| Measurement                                                                                              | Score = 0<br>(No Risk)     | Score = 1<br>(Moderate Risk) | Score = 2<br>(High Risk)                    | References        |
| <b>Cardiovascular Domain (0–12)</b>                                                                      |                            |                              |                                             |                   |
| Total cholesterol, mg/dL                                                                                 | <200                       | 200–240                      | ≥240                                        | [75,103]          |
| HDL-cholesterol, mg/dL                                                                                   | >55 (Male)<br>>65 (Female) | 40–55 (M)<br>50–65 (F)       | <40 (M)<br><50 (F)                          | [49,64,103–105]   |
| LDL-cholesterol, mg/dL                                                                                   | <100                       | 100–130                      | ≥130                                        | [103,106]         |
| Glucose (fasting), mg/dL                                                                                 | <100                       | 100–125                      | >125                                        | [65,75]           |
| Insulin (fasting), μU/mL                                                                                 | ≥2 or <10                  | 10–25                        | ≥25 or <2                                   | [107,108]         |
| HbA1c, %                                                                                                 | <5.7                       | 5.7–6.5                      | ≥6.5                                        | [49,65]           |
| <b>Autonomic Domain (0–6)</b>                                                                            |                            |                              |                                             |                   |
| Pulse Rate (Beats/Min)                                                                                   | ≤60                        | 60–100                       | ≥100                                        | [74,109]          |
| SBP (mm/Hg)                                                                                              | <120                       | 120–140                      | ≥140 mm/Hg<br>or hypertension<br>medication | [62,63,73,75,110] |
| DBP (mm/Hg)                                                                                              | <80                        | 80–90                        | ≥90 mm/Hg                                   | [62,63,73,75,110] |
| <b>Metabolic Domain (0–6)</b>                                                                            |                            |                              |                                             |                   |
| HOMA- <sub>IR</sub><br>Defined as fasting glucose ×<br>Insulin/22.5, to assess the<br>insulin resistance | <2.6                       | 2.6–4.65                     | >4.65 or diabetes<br>diagnosis              | [66,67,72,111]    |
| Triglycerides<br>(mg/dL)                                                                                 | <150                       | ≥150 and <200                | ≥200                                        | [68,112]          |
| Waist circumference<br>(cm)                                                                              | <94 (Male)<br><80 (Female) | 94–102 (M)<br>80–88 (F)      | >102 (M)<br>>88 (F)                         | [69]              |
| <b>Immune Domain (0–4)</b>                                                                               |                            |                              |                                             |                   |
| White Blood Cell Count<br>(1000 cells/μL)                                                                | ≥1.5 and <4.5              | 4.5–11                       | >11 or <1.5                                 | [70,71,113]       |
| CRP<br>(mg/dL)                                                                                           | <0.3                       | 0.3–1                        | >1                                          | [104,108,114]     |

**Table S2.** Comparison of the least square means of allostatic load (immune and autonomic) domain scores: total and individual berry consumers versus nonconsumers, n = 15,620.

| Total and Subtype Berries | Immune Domain (white Blood Cells Counts, CRP) (0–4) |                        |                         |         | Autonomic Domain (pulse Rate, Blood Pressure) (0–6) |                      |                         |         |
|---------------------------|-----------------------------------------------------|------------------------|-------------------------|---------|-----------------------------------------------------|----------------------|-------------------------|---------|
|                           | Consumers (n)                                       | Non-consumers (n)      | Difference Estimate     | P value | Consumers (n)                                       | Non-consumers (n)    | Difference Estimate     | P value |
| <b>Berries</b>            | <b>3026</b>                                         | <b>12594</b>           |                         |         | <b>3026</b>                                         | <b>12594</b>         |                         |         |
| Model 1                   | 1.34<br>(1.30, 1.39)                                | 1.49<br>(1.46, 1.52)   | –0.15<br>(–0.20, –0.11) | <0.0001 | 2.17<br>(2.09, 2.25)                                | 2.34<br>(2.29, 2.39) | –0.17<br>(–0.25, –0.09) | <0.0001 |
| Model 2                   | 1.52<br>(1.45, 1.59)                                | 1.56<br>(1.51, 1.62)   | –0.05<br>(–0.09, –0.01) | 0.029   | 2.49<br>(2.40, 2.58)                                | 2.57<br>(2.49, 2.65) | –0.07<br>(–0.14, –0.01) | 0.0258  |
| <b>Strawberries</b>       | <b>1878</b>                                         | <b>13742</b>           |                         |         | <b>1878</b>                                         | <b>13742</b>         |                         |         |
| Model 1                   | 1.36<br>(1.32, 1.41)                                | 1.48<br>(1.45, 1.51)   | –0.12<br>(–0.16, –0.07) | <0.0001 | 2.22<br>(2.13, 2.32)                                | 2.32<br>(2.27, 2.37) | –0.10<br>(–0.19, –0.01) | 0.038   |
| Model 2                   | 1.548<br>(1.491, 1.605)                             | 1.552<br>(1.515, 1.59) | –0.004<br>(–0.05, 0.04) | 0.848   | 2.55<br>(2.43, 2.67)                                | 2.63<br>(2.54, 2.71) | –0.08<br>(–0.20, 0.04)  | 0.198   |
| <b>Blueberries</b>        | <b>1061</b>                                         | <b>14559</b>           |                         |         | <b>1061</b>                                         | <b>14559</b>         |                         |         |
| Model 1                   | 1.31<br>(1.24, 1.37)                                | 1.48<br>(1.45, 1.51)   | –0.17<br>(–0.24, –0.10) | <0.0001 | 2.11<br>(1.99, 2.23)                                | 2.32<br>(2.27, 2.37) | –0.21<br>(–0.32, –0.10) | 0.0003  |
| Model 2                   | 1.46<br>(1.35, 1.57)                                | 1.50<br>(1.44, 1.56)   | –0.04<br>(–0.14, 0.06)  | 0.429   | 2.58<br>(2.48, 2.68)                                | 2.65<br>(2.61, 2.69) | –0.07<br>(–0.17, 0.04)  | 0.1964  |
| <b>Cranberries</b>        | <b>331</b>                                          | <b>15289</b>           |                         |         | <b>331</b>                                          | <b>15289</b>         |                         |         |
| Model 1                   | 1.31<br>(1.19, 1.42)                                | 1.47<br>(1.44, 1.50)   | –0.16<br>(–0.27, –0.05) | 0.0044  | 2.09<br>(1.89, 2.30)                                | 2.31<br>(2.26, 2.36) | –0.22<br>(–0.41, –0.03) | 0.027   |
| Model 2                   | 1.53<br>(1.41, 1.64)                                | 1.55<br>(1.52, 1.59)   | –0.03<br>(–0.13, 0.07)  | 0.566   | 2.51<br>(2.32, 2.69)                                | 2.63<br>(2.58, 2.69) | –0.13<br>(–0.29, 0.04)  | 0.121   |
| <b>Raspberries</b>        | <b>195</b>                                          | <b>15425</b>           |                         |         | <b>195</b>                                          | <b>15425</b>         |                         |         |
| Model 1                   | 1.41<br>(1.25, 1.53)                                | 1.47<br>(1.44, 1.50)   | –0.06<br>(–0.20, 0.09)  | 0.4536  | 2.15<br>(1.94, 2.37)                                | 2.31<br>(2.26, 2.36) | –0.16<br>(–0.37, 0.06)  | 0.145   |
| Model 2                   | 1.58<br>(1.44, 1.73)                                | 1.55<br>(1.49, 1.61)   | 0.04<br>(–0.11, 0.18)   | 0.613   | 2.59<br>(1.98, 2.43)                                | 2.63<br>(2.57, 2.69) | –0.04<br>(–0.24, 0.15)  | 0.669   |
| <b>Blackberries</b>       | <b>98</b>                                           | <b>15522</b>           |                         |         | <b>98</b>                                           | <b>15522</b>         |                         |         |
| Model 1                   | 1.20<br>(0.99, 1.41)                                | 1.47<br>(1.44, 1.50)   | –0.27<br>(–0.49, –0.06) | 0.014   | 1.84<br>(1.52, 2.16)                                | 2.31<br>(2.26, 2.36) | –0.47<br>(–0.79, –0.15) | 0.0044  |
| Model 2                   | 1.36<br>(1.14, 1.59)                                | 1.56<br>(1.52, 1.60)   | –0.20<br>(–0.42, 0.03)  | 0.089   | 2.34<br>(2.13, 2.56)                                | 2.63<br>(2.57, 2.69) | –0.29<br>(–0.51, –0.08) | 0.007   |
| <b>Cranberry juice</b>    | <b>936</b>                                          | <b>14684</b>           |                         |         | <b>936</b>                                          | <b>14684</b>         |                         |         |
| Model 1                   | 1.41<br>(1.35, 1.47)                                | 1.47<br>(1.44, 1.50)   | –0.07<br>(–0.12, –0.01) | 0.024   | 2.25<br>(2.11, 2.39)                                | 2.31<br>(2.26, 2.36) | –0.06<br>(–0.20, 0.07)  | 0.334   |
| Model 2                   | 1.51<br>(1.43, 1.58)                                | 1.56<br>(1.52, 1.60)   | –0.05<br>(–0.12, 0.01)  | 0.105   | 2.58<br>(2.46, 2.70)                                | 2.63<br>(2.57, 2.69) | –0.05<br>(–0.15, 0.04)  | 0.277   |

Model 2 further adjusted for education, marriage status, family poverty to income ratio, physical activity, smoking status, alcohol consumption, total energy, modified healthy eating index, medication for lowering glucose, lipids, and blood pressure (immune domain), and BMI.

**Table S3.** Comparison of the adjusted least square means of 14 allostatic load biomarkers: berry consumers versus nonconsumers, n = 7684.

| AL Risk Factors      | Consumers              | Nonconsumers            | Model 1                |         | Model 2                |         |
|----------------------|------------------------|-------------------------|------------------------|---------|------------------------|---------|
|                      | LSM<br>(95% CI)        | LSM<br>(95%CI)          | Difference<br>(95% CI) | p-Value | Difference<br>(95% CI) | p-Value |
| Pulse<br>(beats/min) |                        |                         |                        |         |                        |         |
| Berry                | 68.5<br>(67.7, 69.3)   | 71.0<br>(70.4, 71.5)    | -2.5<br>(-3.3, -1.7)   | <0.0001 | -1.4<br>(-2.2, -0.6)   | 0.0006  |
| Strawberry           | 69.4<br>(68.5, 70.3)   | 70.7<br>(70.1, 71.2)    | -1.3<br>(-2.1, -0.4)   | 0.005   | -0.6<br>(-1.6, 0.5)    | 0.287   |
| Blueberry            | 68.0<br>(66.8, 69.3)   | 70.7<br>(70.1, 71.2)    | -2.6<br>(-4.0, -1.3)   | 0.0002  | -2.2<br>(-3.8, -0.6)   | 0.0067  |
| Cranberry            | 66.4<br>(64.4, 68.3)   | 70.6<br>(70.1, 71.1)    | -4.2<br>(-6.1, -2.3)   | <0.0001 | -2.9<br>(-4.9, -0.9)   | 0.0054  |
| Raspberry            | 68.3<br>(66.3, 70.3)   | 70.6<br>(70.0, 71.1)    | -2.2<br>(-4.2, -0.2)   | 0.0284  | -0.9<br>(-2.9, 1.1)    | 0.36    |
| Blackberry           | 65.9<br>(62.8, 69.1)   | 70.6<br>(70.0, 71.1)    | -4.6<br>(-7.8, -1.4)   | 0.0059  | -3.7<br>(-7.2, -0.21)  | 0.0382  |
| Cranberry juice      | 69.4<br>(68.2, 70.6)   | 70.6<br>(70.1, 71.1)    | -1.2<br>(-2.4, -0.02)  | 0.0471  | -1.1<br>(-2.6, 0.4)    | 0.1632  |
| SBP (mm Hg)          |                        |                         |                        |         |                        |         |
| Berry                | 122.4<br>(121.4,123.4) | 124.4<br>(123.5, 125.3) | -2.0<br>(-3.1, -1.0)   | 0.0003  | -0.7<br>(-1.7, 0.31)   | 0.172   |
| Strawberry           | 123.1<br>(121.9,124.2) | 124.2<br>(123.4, 125.1) | -1.2<br>(-2.2, -0.1)   | 0.0399  | -0.02 (-1.1, 1.1)      | 0.96    |
| Blueberry            | 121.8<br>(119.9,123.7) | 124.2<br>(123.4, 125.0) | -2.4<br>(-4.4, -0.5)   | 0.0146  | -1.1<br>(-3.0, 0.7)    | 0.23    |
| Cranberry            | 120.2<br>(117.4,123.1) | 124.2<br>(123.3, 125.0) | -3.9<br>(-6.8, -1.0)   | 0.02    | -1.9<br>(-4.6, 0.8)    | 0.173   |
| Raspberry            | 120.6<br>(118.0,123.3) | 124.1<br>(123.3, 124.9) | -3.5<br>(-6.1, -0.9)   | 0.0085  | -2.1<br>(-4.9, 0.9)    | 0.168   |
| Blackberry           | 119.3<br>(115.8,122.9) | 124.1<br>(123.3, 124.9) | -4.8<br>(-8.5, -1.1)   | 0.0126  | -1.7<br>(-5.8, 2.4)    | 0.41    |
| Cranberry juice      | 122.8<br>(120.7,124.9) | 124.2<br>(123.4, 125.0) | -1.4<br>(-3.3, 0.55)   | 0.1574  | -1.3<br>(-3.6, 0.9)    | 0.226   |
| DBP (mm Hg)          |                        |                         |                        |         |                        |         |

|                           |                        |                         |                         |        |                        |       |
|---------------------------|------------------------|-------------------------|-------------------------|--------|------------------------|-------|
| Berry                     | 69.1<br>(68.3, 70.0)   | 69.3<br>(68.6, 70.0)    | -0.2<br>(-1.1, 0.7)     | 0.6522 | -0.4<br>(-1.2, 0.5)    | 0.401 |
| Strawberry                | 69.3<br>(68.3, 70.3)   | 69.3<br>(68.6, 70.0)    | 0.01<br>(-0.94, 0.96)   | 0.983  | -0.2<br>(-1.1, 0.7)    | 0.633 |
| Blueberry                 | 68.8<br>(67.5, 70.0)   | 69.3<br>(68.7, 70.0)    | -0.6<br>(-1.9, 0.8)     | 0.422  | -0.6<br>(-2.0, 0.9)    | 0.388 |
| Cranberry                 | 69.0<br>(66.7, 71.2)   | 69.3<br>(68.7, 69.9)    | -0.4<br>(-2.5, 1.8)     | 0.745  | -0.2<br>(-2.3, 1.9)    | 0.861 |
| Raspberry                 | 71.1<br>(68.9, 73.2)   | 69.3<br>(68.6, 69.9)    | 1.8<br>(-0.5, 4.0)      | 0.118  | 1.3<br>(-0.8, 3.4)     | 0.21  |
| Blackberry                | 67.7<br>(64.1, 71.4)   | 69.3<br>(68.7, 70.0)    | -1.6<br>(-5.3, 2.1)     | 0.401  | -1.3<br>(-5.0, 2.4)    | 0.491 |
| Cranberry juice           | 67.2<br>(65.7, 68.6)   | 69.4<br>(68.8, 70.1)    | -2.3<br>(-3.7, -0.8)    | 0.0022 | -1.5<br>(-3.1, 0.1)    | 0.057 |
| Total cholesterol (mg/dL) |                        |                         |                         |        |                        |       |
| Berry                     | 195.5<br>(192.9,198.2) | 198.7<br>(197.1, 200.4) | -3.2<br>(-6.3, -0.2)    | 0.04   | -2.9<br>(-6.0, 0.1)    | 0.058 |
| Strawberry                | 195.6<br>(192.6,198.5) | 198.5<br>(196.9, 200.1) | -3.0<br>(-6.1, 0.2)     | 0.068  | -2.8<br>(-5.9, 0.3)    | 0.076 |
| Blueberry                 | 193.4<br>(188.1,198.7) | 198.5<br>(196.9, 200.0) | -5.1<br>(-10.7, 0.5)    | 0.074  | -4.1<br>(-9.7, 1.5)    | 0.15  |
| Cranberry                 | 202.6<br>(191.4,213.8) | 198.1<br>(196.6, 199.6) | 4.5<br>(-6.8, 15.8)     | 0.431  | 4.7<br>(-6.3, 15.6)    | 0.396 |
| Raspberry                 | 199.2<br>(189.0,209.4) | 198.2<br>(196.7, 199.7) | 1.0<br>(-9.4, 11.4)     | 0.848  | 1.7<br>(-7.8, 11.2)    | 0.717 |
| Blackberry                | 201.8<br>(189.9,213.7) | 198.2<br>(196.7, 199.7) | 3.7<br>(-8.4, 15.7)     | 0.548  | 6.5<br>(-5.9, 18.8)    | 0.3   |
| Cranberry juice           | 194.0<br>(189.8,198.2) | 198.5<br>(197.0, 200.0) | -4.5<br>(-8.7, -0.2)    | 0.04   | -1.0<br>(-6.9, 4.9)    | 0.74  |
| HbA1c (%)                 |                        |                         |                         |        |                        |       |
| Berry                     | 5.69<br>(5.64, 5.75)   | 5.78 (5.73, 5.83)       | -0.08<br>(-0.13, -0.04) | 0.001  | -0.03<br>(-0.07, 0.01) | 0.17  |
| Strawberry                | 5.70<br>(5.64, 5.75)   | 5.77 (5.72, 5.82)       | -0.07<br>(-0.12, -0.02) | 0.006  | -0.03<br>(-0.08, 0.01) | 0.112 |
| Blueberry                 | 5.70<br>(5.62, 5.78)   | 5.77 (5.72, 5.82)       | -0.07<br>(-0.14, 0.001) | 0.055  | -0.03<br>(-0.09, 0.03) | 0.298 |
| Cranberry                 | 5.63<br>(5.55, 5.71)   | 5.77 (5.72, 5.81)       | -0.14<br>(-0.21, -0.06) | 0.0004 | -0.04<br>(-0.11, 0.04) | 0.363 |
| Raspberry                 | 5.69<br>(5.58, 5.80)   | 5.76 (5.72, 5.81)       | -0.07<br>(-0.17, 0.03)  | 0.15   | -0.06<br>(-0.14, 0.03) | 0.173 |
| Blackberry                | 5.72<br>(5.55, 5.88)   | 5.76 (5.72, 5.81)       | -0.05<br>(-0.2, 0.11)   | 0.565  | 0.005<br>(-0.12, 0.13) | 0.94  |
| Cranberry juice           | 5.70<br>(5.62, 5.78)   | 5.77 (5.72, 5.82)       | -0.07<br>(-0.14, 0.001) | 0.0518 | -0.04<br>(-0.13, 0.04) | 0.313 |

|                               |                        |                         |                       |         |                      |        |
|-------------------------------|------------------------|-------------------------|-----------------------|---------|----------------------|--------|
| HDL-C<br>(mg/dL)              |                        |                         |                       |         |                      |        |
| Berry                         | 56.2<br>(55.0, 57.4)   | 53.4<br>(52.8, 54.1)    | 2.8<br>(1.5, 4.1)     | <0.0001 | 1.1<br>(-0.1, 2.2)   | 0.063  |
| Strawberry                    | 55.9<br>(54.5, 57.3)   | 53.7<br>(53.1, 54.3)    | 2.2<br>(0.8, 3.7)     | 0.003   | 0.6<br>(-0.6, 1.9)   | 0.338  |
| Blueberry                     | 56.3<br>(54.5, 58.0)   | 53.8<br>(53.2, 54.4)    | 2.5<br>(0.7, 4.3)     | 0.006   | 0.9<br>(-0.7, 2.4)   | 0.264  |
| Cranberry                     | 58.0<br>(55.1, 60.8)   | 53.8<br>(53.3, 54.4)    | 4.1<br>(1.4, 6.8)     | 0.0032  | 1.0<br>(-1.3, 3.2)   | 0.389  |
| Raspberry                     | 55.6<br>(52.1, 59.1)   | 53.9<br>(53.3, 54.5)    | 1.7<br>(-1.8, 5.1)    | 0.3314  | 0.4<br>(-2.6, 3.3)   | 0.802  |
| Blackberry                    | 60.1<br>(54.1, 66.0)   | 53.9<br>(53.3, 54.5)    | 6.2<br>(0.3, 12.1)    | 0.04    | 2.5<br>(-3.0, 8.1)   | 0.362  |
| Cranberry<br>juice            | 54.2<br>(52.4, 56.1)   | 53.9<br>(53.3, 54.5)    | 0.3<br>(-1.5, 2.2)    | 0.728   | -0.4<br>(-2.5, 1.7)  | 0.681  |
| LDL-C<br>(mg/dL)              |                        |                         |                       |         |                      |        |
| Berry                         | 114.0<br>(111.9,116.1) | 117.5<br>(115.9, 119.0) | -3.5<br>(-5.9, -1.1)  | 0.006   | -2.9<br>(-5.2, -0.7) | 0.012  |
| Strawberry                    | 114.9<br>(112.3,117.4) | 117.1<br>(115.7, 118.5) | -2.2<br>(-5.0, 0.5)   | 0.105   | -1.8<br>(-4.4, 0.8)  | 0.17   |
| Blueberry                     | 112.3<br>(108.6,116.1) | 117.1<br>(115.7, 118.5) | -4.8<br>(-8.7, -0.8)  | 0.018   | -3.7<br>(-7.5, 0.02) | 0.051  |
| Cranberry                     | 118.9<br>(110.7,127.1) | 116.8<br>(115.5, 118.2) | 2.1<br>(-6.1, 10.3)   | 0.612   | 2.7<br>(-5.2, 10.5)  | 0.496  |
| Raspberry                     | 118.1<br>(108.4,127.8) | 116.8<br>(115.5, 118.2) | 1.3<br>(-8.6, 11.2)   | 0.798   | 2.3<br>(-6.8, 11.4)  | 0.618  |
| Blackberry                    | 121.6<br>(110.5,132.7) | 116.8<br>(115.5, 118.2) | 4.8<br>(-6.4, 16.0)   | 0.394   | 8.0<br>(-2.9, 19.0)  | 0.146  |
| Cranberry<br>juice            | 113.2<br>(109.4,117.0) | 117.1<br>(115.7, 118.5) | -3.9<br>(-7.9, -0.02) | 0.049   | -1.6<br>(-7.1, 3.8)  | 0.547  |
| Fasting<br>glucose<br>(mg/dL) |                        |                         |                       |         |                      |        |
| Berry                         | 106.0<br>(104.1,108.1) | 109.6<br>(107.9, 111.2) | -3.5<br>(-5.1, -1.9)  | <0.0001 | -1.9<br>(-3.5, -0.3) | 0.021  |
| Strawberry                    | 106.2<br>(103.8,108.5) | 109.3<br>(107.7, 110.9) | -3.1<br>(-4.9, -1.3)  | 0.0009  | -2.0<br>(-3.8, -0.2) | 0.0299 |
| Blueberry                     | 105.5<br>(103.4,107.7) | 109.2<br>(107.5, 110.8) | -3.6<br>(-5.5, -1.8)  | 0.0003  | -2.3<br>(-4.1, -0.5) | 0.011  |
| Cranberry                     | 105.7<br>(102.8,108.7) | 109.0<br>(107.4, 110.6) | -3.3<br>(-6.0, -0.5)  | 0.022   | -0.2<br>(-3.0, 2.6)  | 0.887  |
| Raspberry                     | 105.1<br>(101.7,108.6) | 109.0<br>(107.4, 110.6) | -3.9<br>(-6.9, -0.8)  | 0.013   | -3.7<br>(-6.4, -0.9) | 0.009  |
| Blackberry                    | 104.6<br>(99.8, 109.4) | 109.0<br>(107.4, 110.6) | -4.4<br>(-9.0, 0.24)  | 0.063   | -2.5<br>(-8.4, 3.3)  | 0.385  |

|                         |                        |                         |                         |         |                         |         |
|-------------------------|------------------------|-------------------------|-------------------------|---------|-------------------------|---------|
| Cranberry juice         | 106.4<br>(103.8,109.0) | 109.1<br>(107.5, 110.8) | -2.7<br>(-4.9, -0.5)    | 0.017   | -2.0<br>(-4.7, 0.7)     | 0.139   |
| Fasting insulin (μU/mL) |                        |                         |                         |         |                         |         |
| Berry                   | 11.0<br>(10.3, 11.8)   | 12.9<br>(12.4, 13.4)    | -1.9<br>(-2.6, -1.1)    | <0.0001 | -0.8<br>(-1.4, -0.2)    | 0.009   |
| Strawberry              | 11.3<br>(10.5, 12.2)   | 12.7<br>(12.3, 13.2)    | -1.4<br>(-2.2, -0.6)    | 0.0011  | -0.4<br>(-1.1, 0.3)     | 0.222   |
| Blueberry               | 10.4<br>(9.6, 11.2)    | 12.7<br>(12.2, 13.2)    | -2.3<br>(-3.1, -1.5)    | <0.0001 | -1.4<br>(-2.0, -0.7)    | <0.0001 |
| Cranberry               | 10.2<br>(9.0, 11.3)    | 12.6<br>(12.2, 13.1)    | -2.5<br>(-3.6, -1.4)    | <0.0001 | -0.5<br>(-1.4, 0.5)     | 0.326   |
| Raspberry               | 12.8<br>(11.1, 14.5)   | 12.6<br>(12.1, 13.0)    | 0.24<br>(-1.4, 1.9)     | 0.771   | 0.9<br>(-0.4, 2.1)      | 0.184   |
| Blackberry              | 9.8<br>(7.4, 12.2)     | 12.6<br>(12.1, 13.1)    | -2.8<br>(-5.2, -0.4)    | 0.021   | -0.3<br>(-1.7, 1.0)     | 0.622   |
| Cranberry juice         | 11.8<br>(10.4, 13.1)   | 12.6<br>(12.2, 13.1)    | -0.9<br>(-2.1, 0.4)     | 0.184   | -0.7<br>(-2.0, 0.6)     | 0.257   |
| Triglycerides (mg/dL)   |                        |                         |                         |         |                         |         |
| Berry                   | 127.4<br>(121.1,133.6) | 142.7<br>(138.7, 146.8) | -15.4<br>(-22.4, -8.3)  | <0.0001 | -7.5<br>(-14.4, -0.7)   | 0.0314  |
| Strawberry              | 126.9<br>(118.6,135.2) | 141.7<br>(137.8, 145.6) | -14.8<br>(-23.7, -6.0)  | 0.0013  | -7.9<br>(-16.4, 0.6)    | 0.068   |
| Blueberry               | 121.8<br>(112.1,131.6) | 141.2<br>(137.4, 145.0) | -19.3<br>(-29.4, -9.3)  | 0.0003  | -11.1<br>(-21.0, -1.3)  | 0.027   |
| Cranberry               | 125.8<br>(108.1,143.4) | 140.4<br>(136.6, 144.1) | -14.6<br>(-32.4, 3.1)   | 0.105   | -0.22<br>(-16.9, 16.4)  | 0.979   |
| Raspberry               | 128.1<br>(109.3,146.9) | 140.2<br>(136.5, 143.9) | -12.1<br>(-30.7, 6.4)   | 0.196   | -6.8<br>(-25.4, 11.7)   | 0.464   |
| Blackberry              | 102.0<br>(83.9, 120.0) | 140.3<br>(136.6, 144.1) | -38.4<br>(-56.9, -19.8) | 0.0001  | -20.8<br>(-38.1, -3.5)  | 0.019   |
| Cranberry juice         | 134.8<br>(124.6,145.0) | 140.5<br>(136.7, 144.2) | -5.6<br>(-15.6, 4.4)    | 0.264   | 4.8<br>(-6.9, 16.4)     | 0.42    |
| HOMA-IR                 |                        |                         |                         |         |                         |         |
| Berry                   | 3.1<br>(2.8, 3.4)      | 3.6<br>(3.5, 3.8)       | -0.6<br>(-0.8, -0.3)    | <0.0001 | -0.24<br>(-0.45, -0.04) | 0.0221  |
| Strawberry              | 3.2 (2.8, 3.5)         | 3.6<br>(3.4, 3.8)       | -0.4<br>(-0.7, -0.1)    | 0.0054  | -0.1<br>(-0.4, 0.1)     | 0.3533  |
| Blueberry               | 2.9<br>(2.6, 3.1)      | 3.6<br>(3.4, 3.8)       | -0.7<br>(-1.0, -0.5)    | <0.0001 | -0.4<br>(-0.6, -0.3)    | <0.0001 |
| Cranberry               | 2.8<br>(2.4, 3.1)      | 3.6<br>(3.4, 3.7)       | -0.8<br>(-1.1, -0.5)    | <0.0001 | -0.16<br>(-0.44, 0.11)  | 0.247   |
| Raspberry               | 3.5<br>(2.9, 4.1)      | 3.6<br>(3.4, 3.7)       | -0.04<br>(-0.57, 0.49)  | 0.872   | 0.11<br>(-0.3, 0.5)     | 0.578   |
| Blackberry              | 2.7                    | 3.6                     | -0.9                    | 0.017   | -0.18                   | 0.41    |

|                                   |                       |                      |                         |         |                        |         |
|-----------------------------------|-----------------------|----------------------|-------------------------|---------|------------------------|---------|
|                                   | (2.0, 3.4)            | (3.4, 3.7)           | (-1.5, -0.2)            |         | (-0.6, 0.3)            |         |
| Cranberry juice                   | 3.2<br>(2.8, 3.6)     | 3.6<br>(3.4, 3.7)    | -0.3<br>(-0.7, 0.06)    | 0.095   | -0.26<br>(-0.65, 0.14) | 0.1973  |
| WC (cm)                           |                       |                      |                         |         |                        |         |
| Berry                             | 95.9<br>(95.0, 96.9)  | 99.3<br>(98.7, 99.9) | -3.4<br>(-4.3, -2.5)    | <0.0001 | -1.2<br>(-1.8, -0.7)   | <0.0001 |
| Strawberry                        | 96.1<br>(94.9, 97.2)  | 99.1<br>(98.4, 99.7) | -3.0<br>(-4.1, -1.8)    | <0.0001 | -1.1<br>(-1.7, -0.4)   | 0.0014  |
| Blueberry                         | 95.4<br>(93.6, 97.2)  | 98.9<br>(98.3, 99.5) | -3.5<br>(-5.3, -1.7)    | 0.0002  | -1.6<br>(-2.5, -0.6)   | 0.0012  |
| Cranberry                         | 93.4<br>(90.7, 96.0)  | 98.8<br>(98.2, 99.4) | -5.4<br>(-8.0, -2.9)    | <0.0001 | -1.3<br>(-2.7, 0.03)   | 0.055   |
| Raspberry                         | 98.8<br>(95.3, 102.3) | 98.7<br>(98.1, 99.3) | 0.1<br>(-3.4, 3.5)      | 0.969   | 0.39<br>(-1.7, 2.5)    | 0.714   |
| Blackberry                        | 93.2<br>(87.9, 98.6)  | 98.8<br>(98.1, 99.4) | -5.5<br>(-11.0, -0.07)  | 0.047   | -0.68<br>(-4.0, 2.6)   | 0.682   |
| Cranberry juice                   | 97.8<br>(95.8, 99.9)  | 98.8<br>(98.2, 99.4) | -0.9<br>(-2.9, 1.1)     | 0.355   | -0.28<br>(-1.4, 0.8)   | 0.614   |
| White Blood Cells (1000 cells/uL) |                       |                      |                         |         |                        |         |
| Berry                             | 6.2 (6.1, 6.4)        | 6.8 (6.7, 6.9)       | -0.6<br>(-0.7, -0.4)    | <0.0001 | -0.3<br>(-0.4, -0.1)   | 0.0032  |
| Strawberry                        | 6.3 (6.2, 6.5)        | 6.8 (6.7, 6.9)       | -0.4<br>(-0.6, -0.2)    | <0.0001 | -0.1<br>(-0.3, 0.1)    | 0.245   |
| Blueberry                         | 6.3 (6.0, 6.6)        | 6.7 (6.6, 6.9)       | -0.4<br>(-0.8, -0.1)    | 0.0129  | -0.2<br>(-0.5, 0.1)    | 0.22    |
| Cranberry                         | 6.3 (5.7, 6.9)        | 6.7 (6.6, 6.8)       | -0.4<br>(-1.0, 0.2)     | 0.145   | 0.03<br>(-0.5, 0.6)    | 0.91    |
| Raspberry                         | 6.4 (6.0, 6.9)        | 6.7 (6.6, 6.8)       | -0.3<br>(-0.7, 0.1)     | 0.176   | 0.04<br>(-0.4, 0.5)    | 0.86    |
| Blackberry                        | 5.7 (5.0, 6.3)        | 6.7 (6.6, 6.8)       | -1.1<br>(-1.7, -0.4)    | 0.0019  | -0.5<br>(-1.0, 0.1)    | 0.094   |
| Cranberry juice                   | 6.5 (6.3, 6.7)        | 6.7 (6.6, 6.8)       | -0.2<br>(-0.5, -0.02)   | 0.0321  | -0.3<br>(-0.5, -0.01)  | 0.04    |
| CRP (mg/dL)                       |                       |                      |                         |         |                        |         |
| Berry                             | 0.39<br>(0.33, 0.45)  | 0.44<br>(0.40, 0.49) | -0.05<br>(-0.11, 0.004) | 0.0668  | 0.001<br>(-0.05, 0.05) | 0.959   |
| Strawberry                        | 0.40<br>(0.33, 0.47)  | 0.44<br>(0.39, 0.48) | -0.04<br>(-0.11, 0.03)  | 0.274   | 0.01<br>(-0.05, 0.08)  | 0.648   |
| Blueberry                         | 0.38<br>(0.28, 0.47)  | 0.44<br>(0.39, 0.48) | -0.06<br>(-0.15, 0.04)  | 0.226   | -0.01<br>(-0.1, 0.07)  | 0.749   |
| Cranberry                         | 0.32<br>(0.22, 0.43)  | 0.44<br>(0.39, 0.48) | -0.11<br>(-0.21, -0.02) | 0.021   | -0.02<br>(-0.1, 0.07)  | 0.684   |
| Raspberry                         | 0.40<br>(0.28, 0.52)  | 0.43<br>(0.39, 0.48) | -0.03<br>(-0.14, 0.08)  | 0.586   | 0.02<br>(-0.1, 0.13)   | 0.776   |
| Blackberry                        | 0.19                  | 0.44                 | -0.25                   | <0.0001 | -0.15                  | <0.0001 |

|           | (0.11, 0.27) | (0.39, 0.48) | (-0.32, -0.17) |      | (-0.21, -0.09) |       |
|-----------|--------------|--------------|----------------|------|----------------|-------|
| Cranberry | 0.39         | 0.44         | -0.04          | 0.39 | -0.06          | 0.309 |
| juice     | (0.29, 0.50) | (0.39, 0.48) | (-0.14, 0.05)  |      | (-0.18, 0.06)  |       |

Model 1 adjusted for age, sex, and race/ethnicity.

Model 2 further adjusted for education, marriage status, family poverty to income ratio, physical activity, smoking status, alcohol consumption, total energy, modified healthy eating index, medication for lowering glucose, lipids, and blood pressure, and BMI.

LSM: least square mean



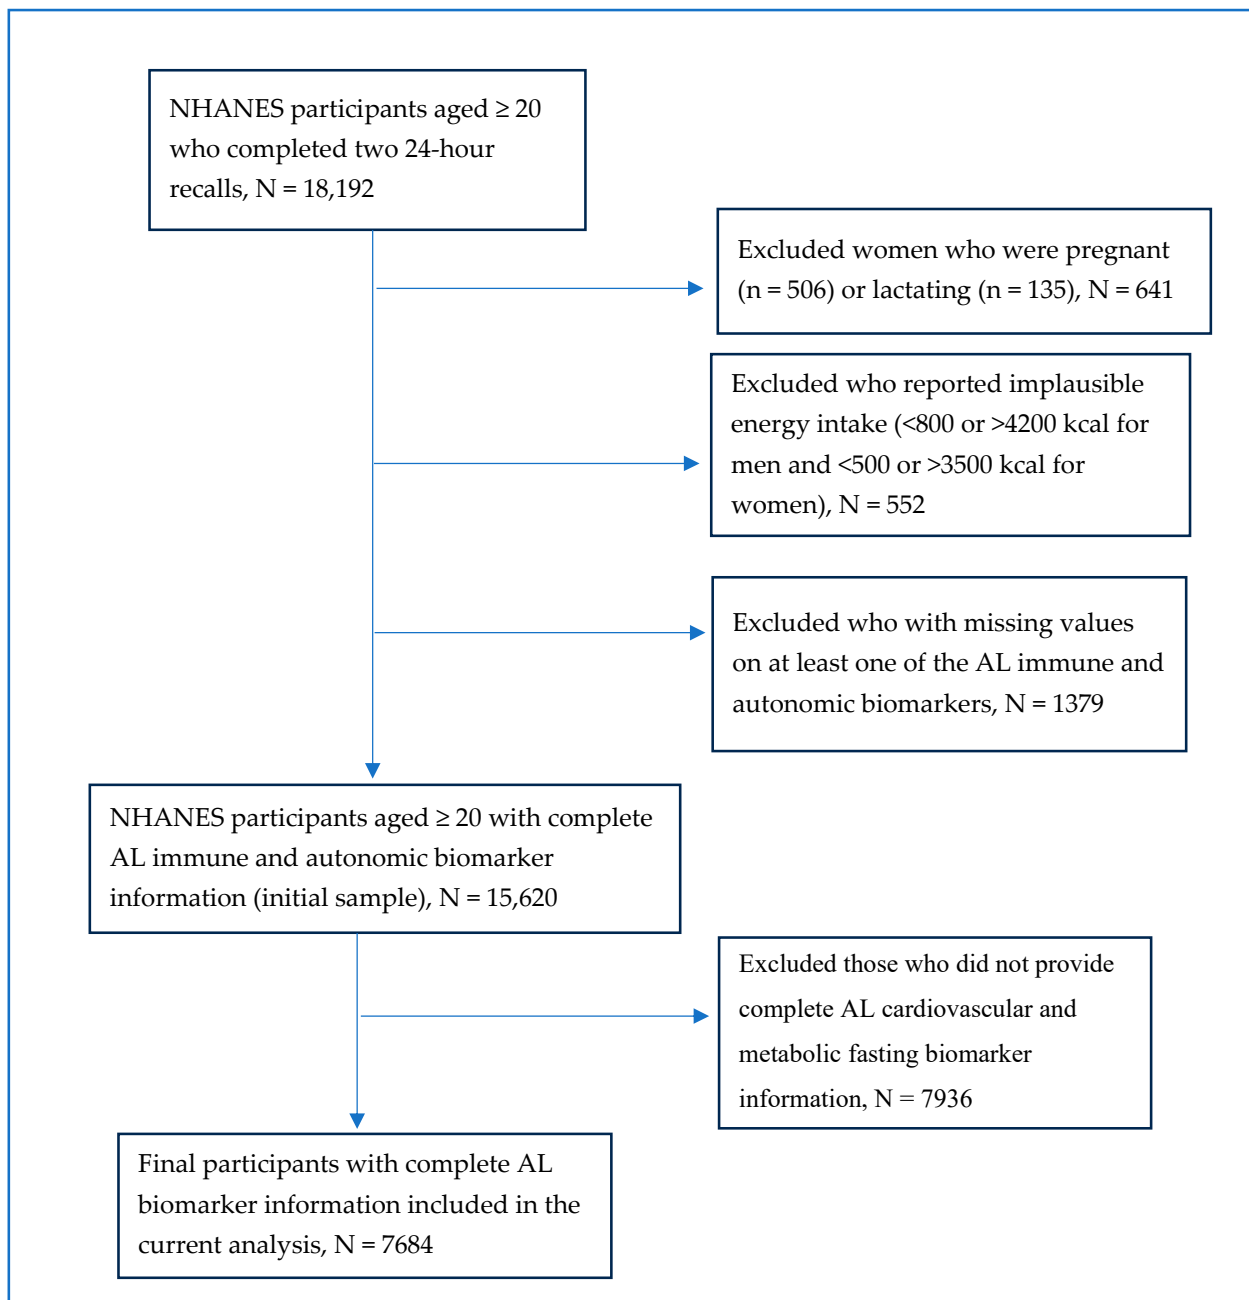

**Figure S1.** Participant flow chart.
